# Supplementary material for: Carbon supported Ru clusters prepared by pyrolysis of Ru precursor-impregnated biopolymer fibers
Source: Royal Society of Chemistry journal article supplement (doi:10.1039/c5ta04253d), 2015-01-01
Supplement: c5ta04253d1.pdf [file c5ta04253d1.pdf]

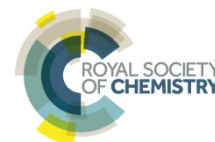

Journal Name

ARTICLE

Supplementary information

## Carbon supported Ru clusters prepared by pyrolysis of Ru precursor-impregnated biopolymer fibers

Andreas Kalytta-Mewes,[a] Sebastian Spirkel,[a] Sebastian Tränkle,[a] Manuel Hambach [a] and Dirk Volkmer\*[a]

---

[a] A. Kalytta-Mewes, S. Spirkel, S. Tränkle, M. Hambach, Prof. Dr. D. Volkmer  
Chair of Solid State Chemistry  
University of Augsburg, Institute of Physics  
Universitätsstrasse 1, 86159 Augsburg, Germany  
E-mail: dirk.volkmer@physik.uni-augsburg.de

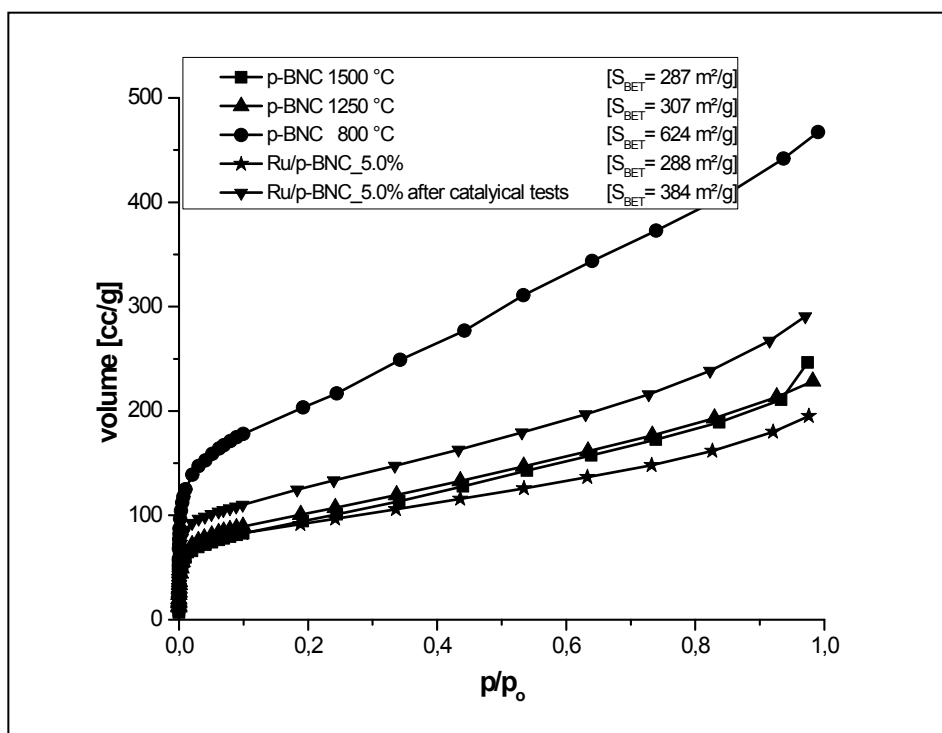

**Figure A** Adsorption isotherms (Ar, 77K) of BNC pyrolyzed at 800 °C and 1500 °C under N<sub>2</sub> atmosphere and BNC pyrolyzed at 1250 °C under Ar atmosphere, in comparison to a sample of Ru/p-BNC\_5.0% before and after catalytic tests.

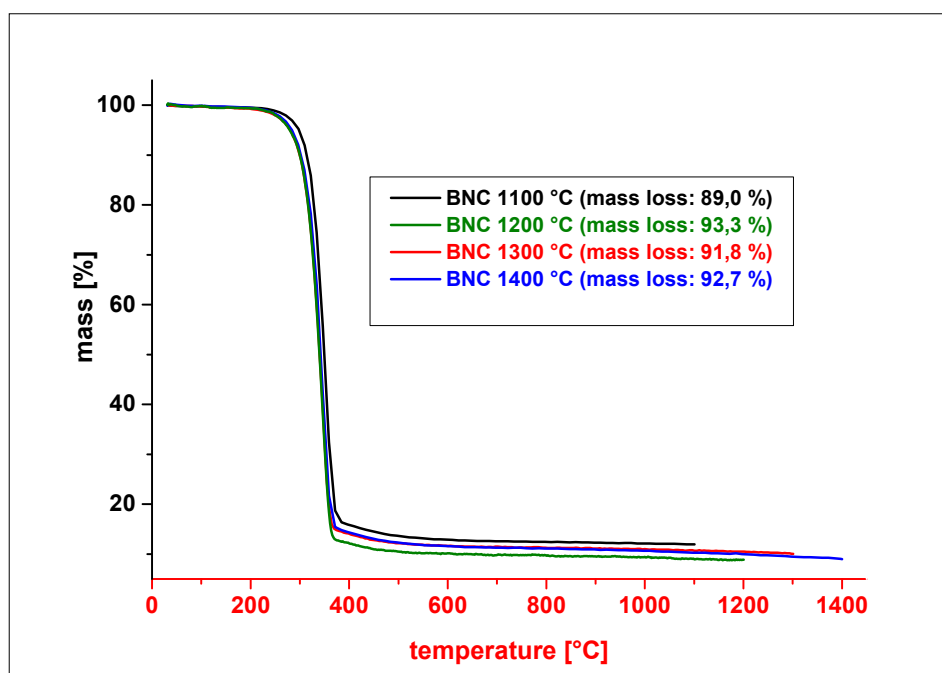

**Figure B** Thermogravimetric measurements of BNC samples up to different temperatures in Ar atmosphere. The end temperatures are stepwisely increased at 100 °C steps from 1100 °C to 1400 °C.

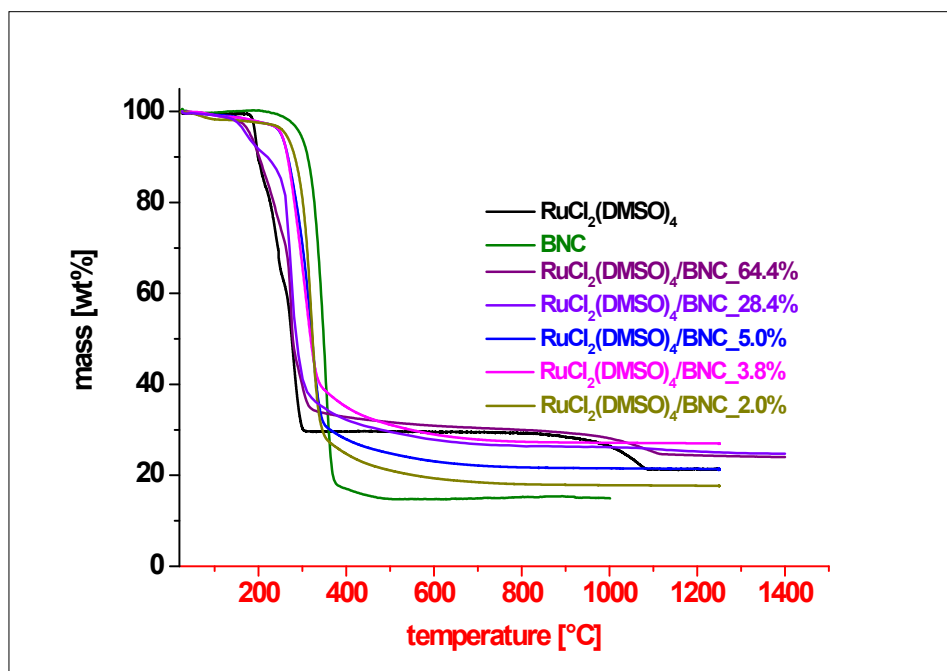

**Figure C** Thermogravimetric measurements of RuCl<sub>2</sub>(DMSO)<sub>4</sub>/BNC\_2.0% - 64.4% in comparison to BNC and RuCl<sub>2</sub>(DMSO)<sub>4</sub> under Ar atmosphere. Higher concentration of the Ru-precursor shifts the decomposition onset temperature to lower temperatures.

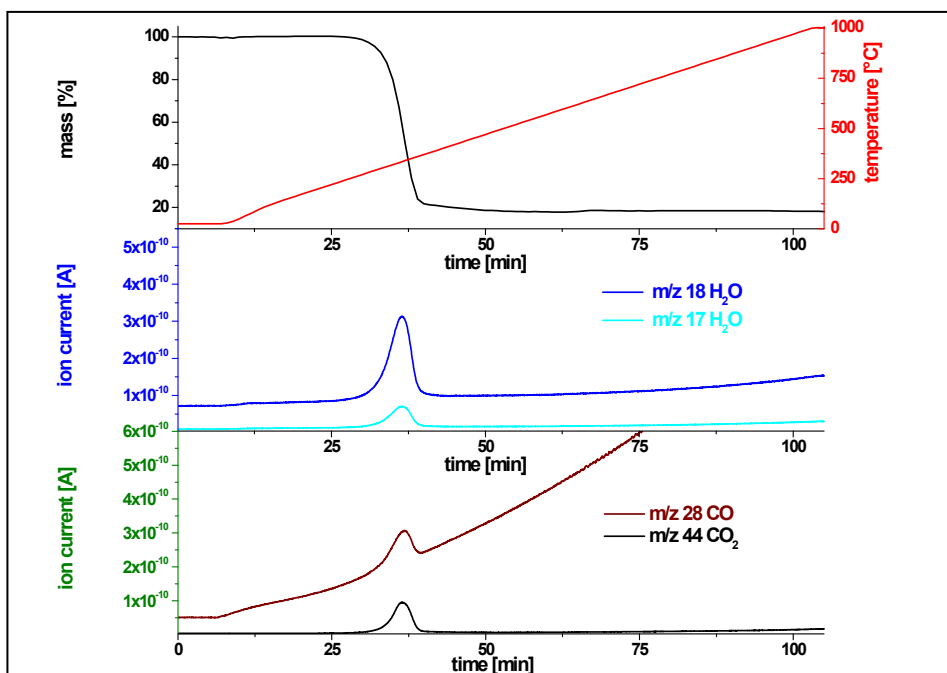

**Figure D** TGA-MS measurement of BNC up to 1000 °C under Ar atmosphere. m/z 18 and m/z 17 are indicating water. Areas underneath the Peaks of m/e 28 and m/e 44 are almost equal; hence CO<sub>2</sub> and CO were released.

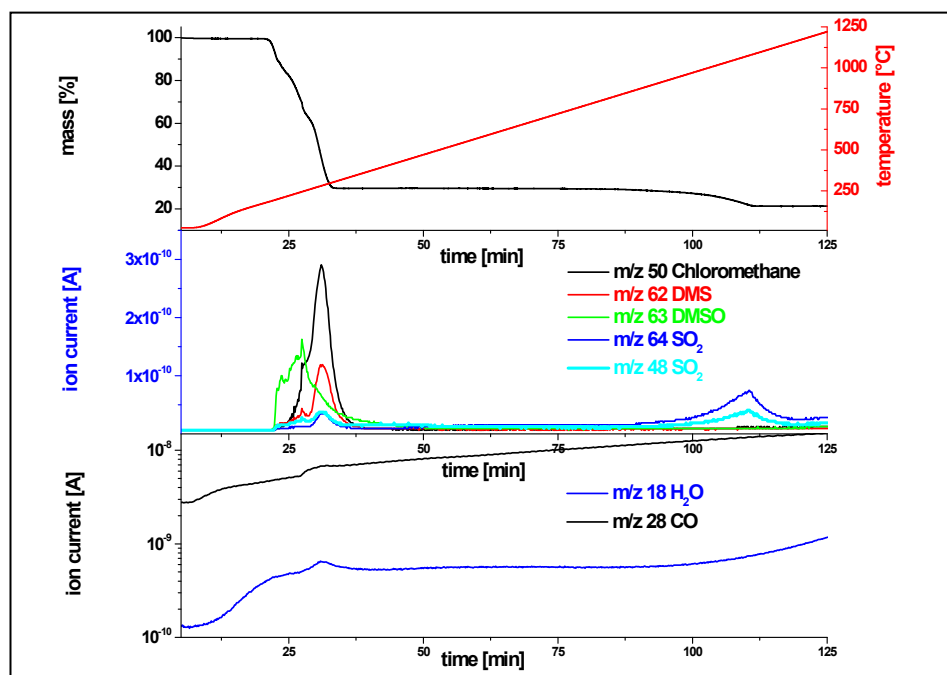

**Figure E** TGA-MS measurement of  $\text{RuCl}_2(\text{DMSO})_4$  up to 1250 °C under Ar atmosphere. m/z 50 for  $\text{CH}_2\text{Cl}$ ; m/z 62 for DMS; m/z 63 DMSO; m/z 64 and m/z 48 for  $\text{SO}_2$ ; m/z 18 for  $\text{H}_2\text{O}$ ; m/z 28  $\text{CO}$ ;

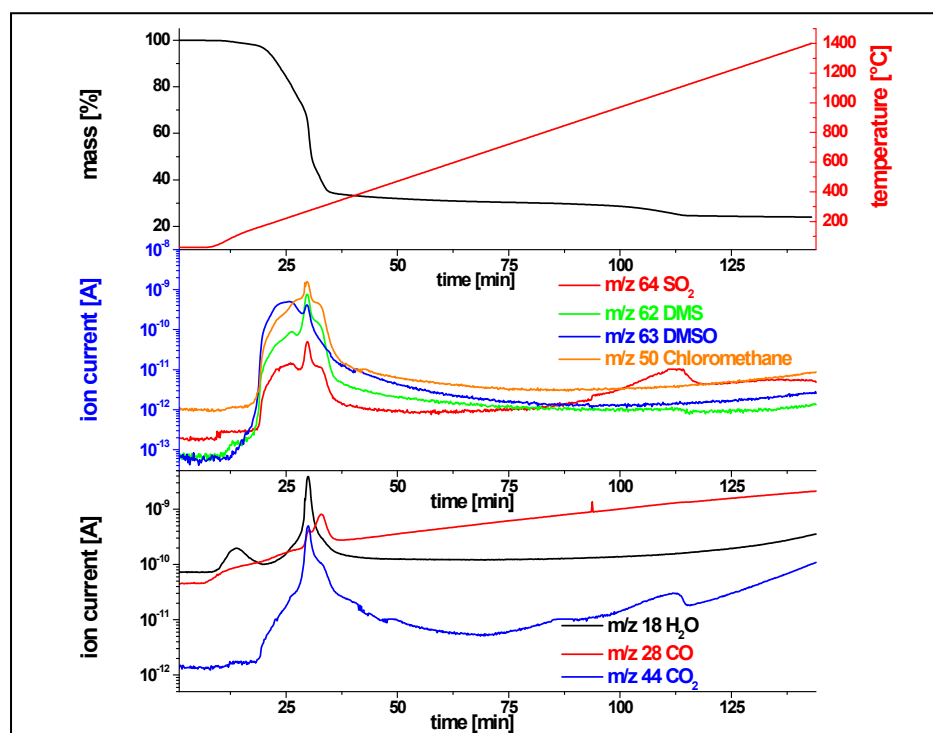

**Figure F** TGA-MS measurement of Ru/p-BNC\_64.4% up to 1400 °C under Ar atmosphere. m/z 50 for  $\text{CH}_3\text{Cl}$ ; m/z 62 for DMS; m/z 63 DMSO; m/z 64  $\text{SO}_2$ ; m/z 18 for  $\text{H}_2\text{O}$ ; m/z 28  $\text{CO}$ ; m/z 44 for  $\text{CO}_2$ . For a better overview of the decomposition process the ion currents of the MS-signals are shown in logarithmical scale.

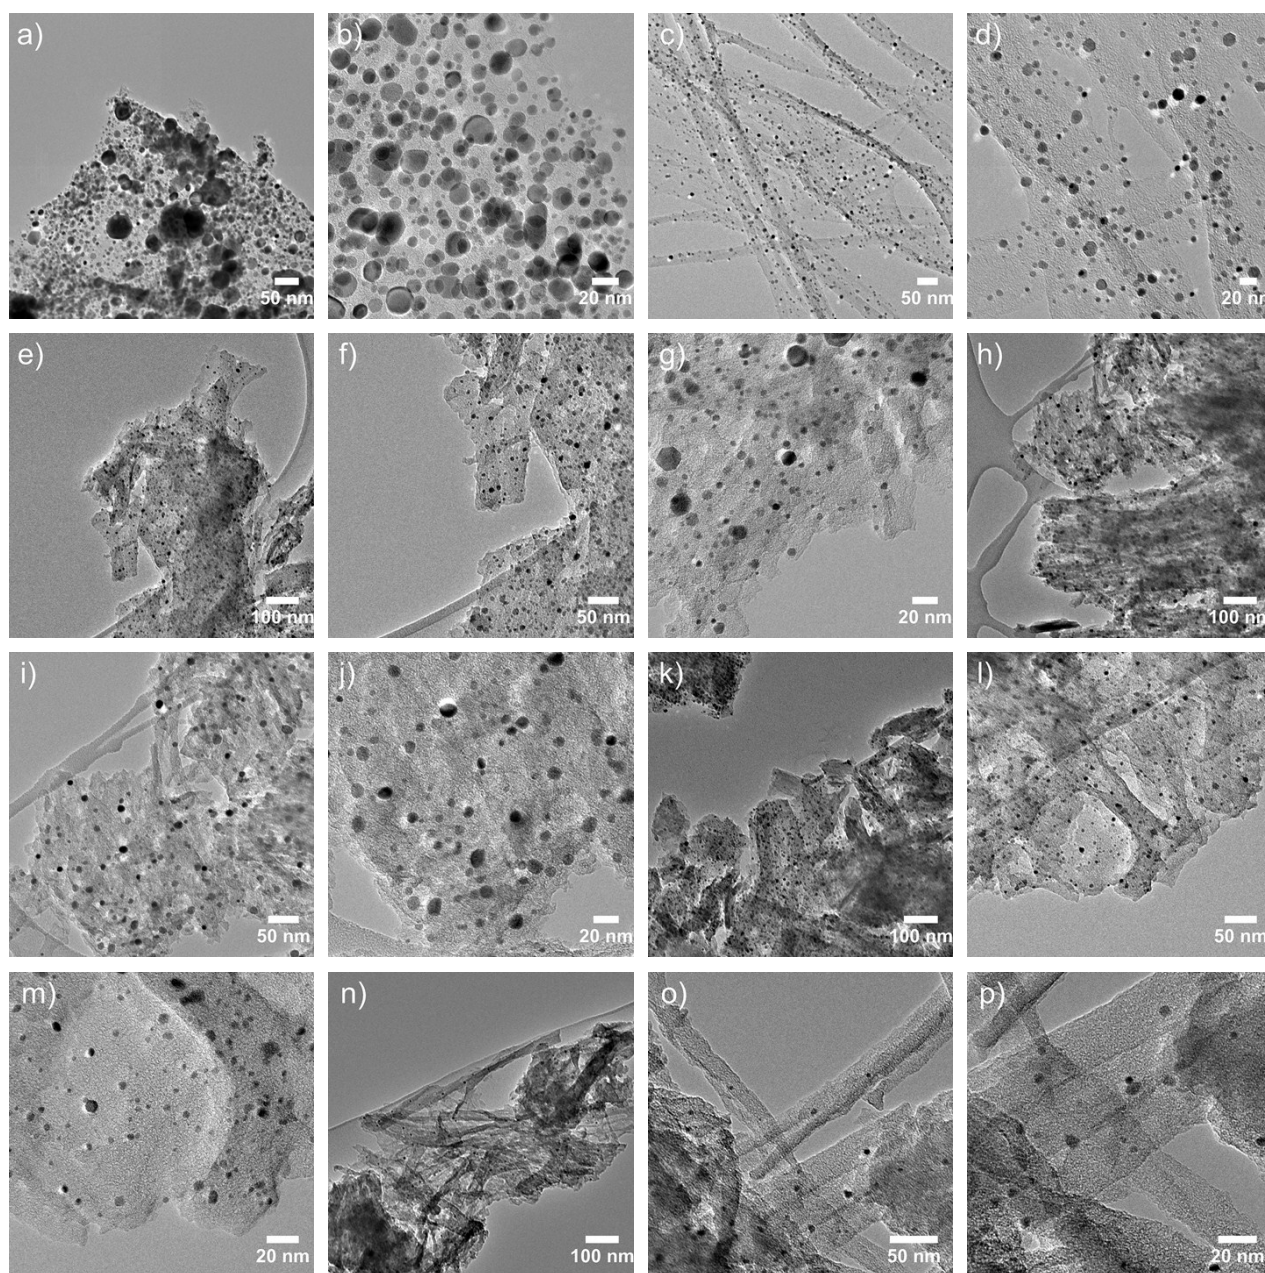

**Figure G** TEM images of carbon supported Ru-clusters: a, b: Ru/p-BNC\_64.4%; c, d: Ru/p-BNC\_28.3%; e, f, g: Ru/p-BNC\_5.0%; h, i, j: Ru/p-BNC\_5.0% after catalytic tests; k, l, m: Ru/p-BNC\_3.8%; n, o, p: Ru/p-BNC\_2.0%

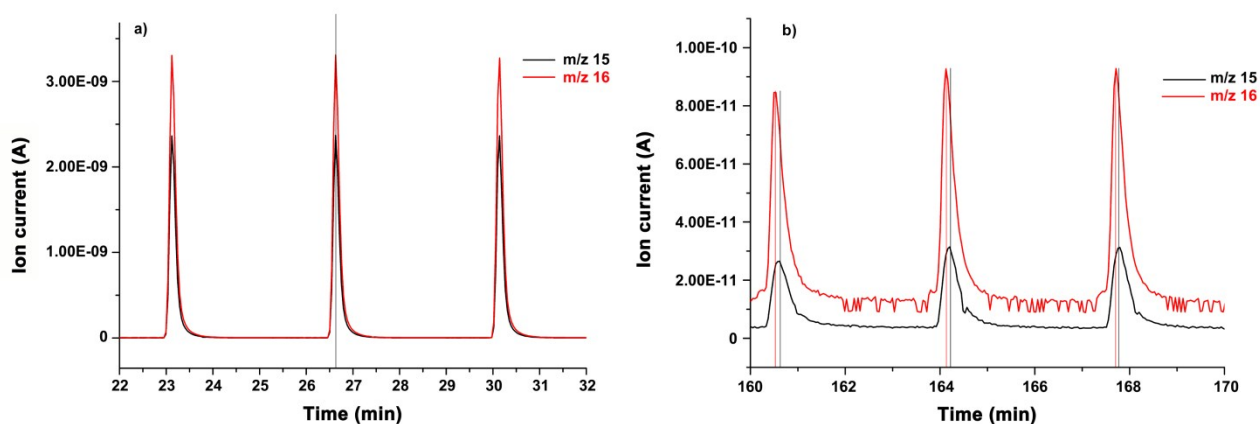

**Figure H** a) Mass spectrum of methane calibration pulses to determine the ratio of the peak areas for  $m/z$  values 15 and 16. The vertical black line indicates the same peak positions. b) Pulse experiment with Ru/p-BNC\_3.8%: carbon monoxide pulses with hydrogen as carrier gas. Due to reaction with the catalyst, carbon monoxide ( $m/z$  16) is reduced to methane ( $m/z$  15, 16). The black and red vertical lines illustrate the delayed detection of methane.

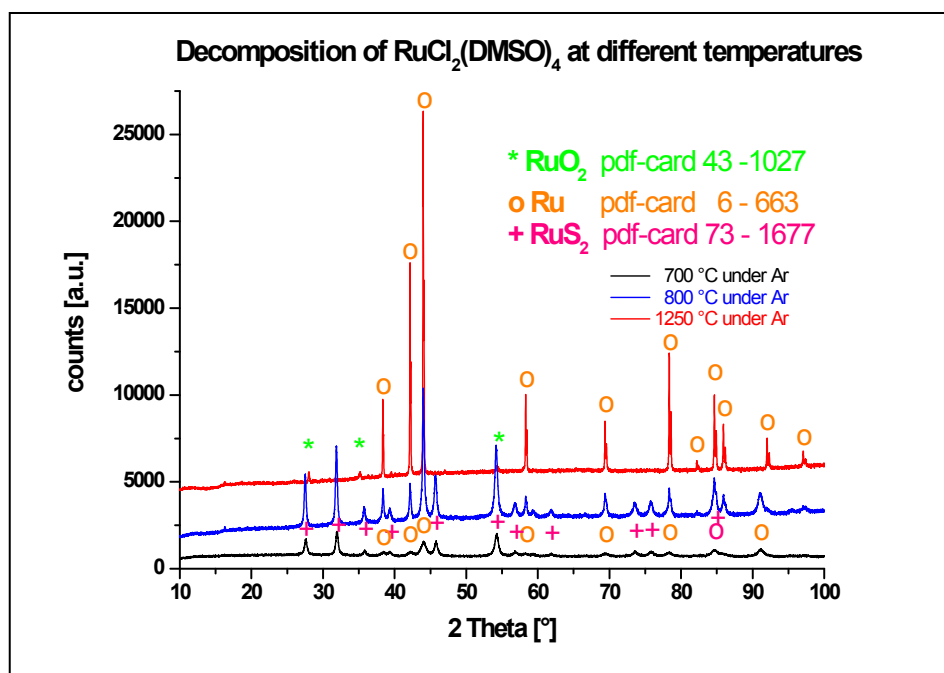

**Figure I** Powder diffractions of decomposition products from  $\text{RuCl}_2(\text{DMSO})_4$  at different temperatures (under Ar flow).

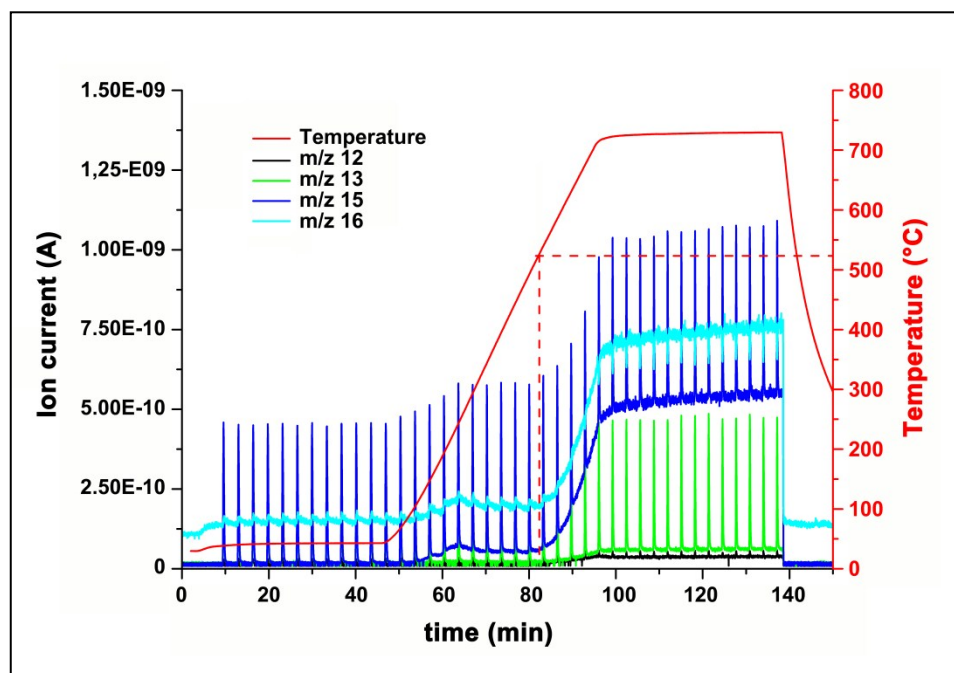

**Figure J** Pulse experiment of Ru/p-BNC\_3.8%. The sample was heated up to 800 °C (oven temperature, 10K/min) in an Ar/H<sub>2</sub> (5%) gas atmosphere (30ml/min). Every 3 min an injection of nitrogen (pulse volume 0.9200 ml) takes place. At ~ 525 °C (dashed line), hydrogen reduces the carbon support material to form methane (increase of m/z: 16, 15, 14, 13, 12). m/z 14 is not displayed for reasons of clarity (nitrogen: m/z 28, 14)

| Sample       | Gas            | Temperature | D-band                      |                             | G-band                      |                             |                                                           |
|--------------|----------------|-------------|-----------------------------|-----------------------------|-----------------------------|-----------------------------|-----------------------------------------------------------|
|              |                |             | Peak<br>[cm <sup>-1</sup> ] | FHWM<br>[cm <sup>-1</sup> ] | Peak<br>[cm <sup>-1</sup> ] | FHWM<br>[cm <sup>-1</sup> ] | Raman band ratio<br>$A_{D\text{-band}}/A_{G\text{-band}}$ |
| p-BNC        | N <sub>2</sub> | 1250 °C     | 1350±1                      | 165.3±20.0                  | 1590±3                      | 93.5±4.4                    | 3.27±0.17                                                 |
| p-BNC        | N <sub>2</sub> | 1400 °C     | 1344±1                      | 120.5±1.7                   | 1592±1                      | 82.1±6.3                    | 3.00±0.04                                                 |
| p-BNC        | Ar             | 1250 °C     | 1348±1                      | 154.3±0.1                   | 1589±1                      | 93.1±2.0                    | 2.94±0.26                                                 |
| p-BNC        | Ar             | 1400 °C     | 1345±1                      | 121.1±3.7                   | 1596±3                      | 68.8±8.6                    | 2.71±0.17                                                 |
| Ru/p-BNC_3.8 | N <sub>2</sub> | 1250 °C     | 1347±1                      | 154.1±4.2                   | 1593±1                      | 87.7±1.1                    | 3.48±0.13                                                 |
| Ru/p-BNC_3.8 | N <sub>2</sub> | 1400 °C     | 1347±2                      | 127.5±7.1                   | 1594±1                      | 84.0±1.8                    | 2.89±0.14                                                 |
| Ru/p-BNC_3.8 | Ar             | 1250 °C     | 1349±1                      | 167.9±8.3                   | 1592±2                      | 91.9±1.4                    | 3.59±0.06                                                 |
| Ru/p-BNC_3.8 | Ar             | 1400 °C     | 1346±3                      | 119.4±15.4                  | 1595±1                      | 82.2±2.6                    | 2.85±0.23                                                 |

**Table A:** Raman spectroscopy data of p-BNC and Ru/p-BNC\_3.8 samples, prepared under different gases and temperatures. Raman spectra of each sample were recorded at seven different positions. Each spectrum was smoothed, base line corrected and fitted with a two peak Gaussian/Lorentzian fit function.



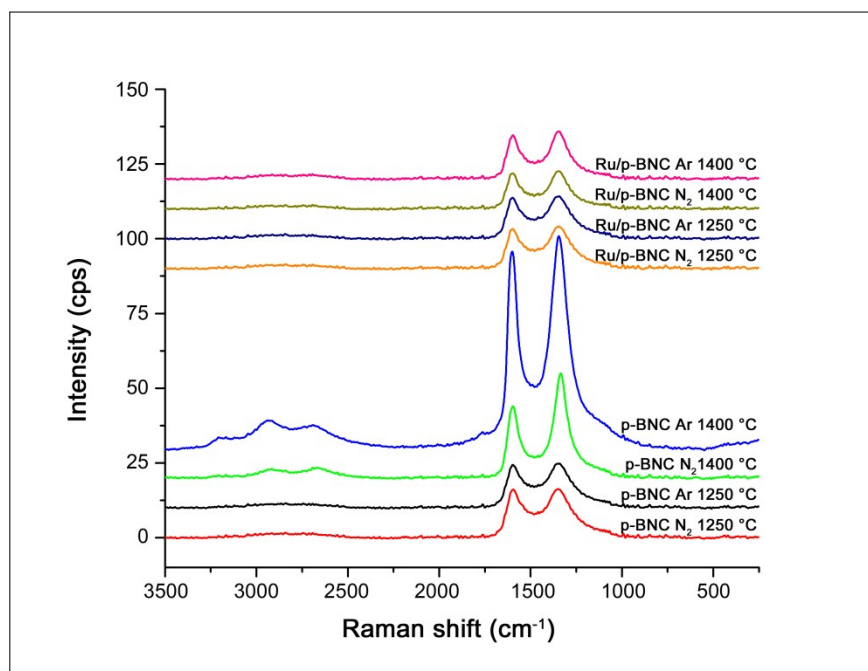

**Figure K** Raman spectra of p-BNC and Ru/BNC\_3.8 prepared under different pyrolysis gases and at different temperatures. For clarity the spectra are stacked and the noise was smoothed with a FFT function.
